# Supplementary material for: Clinical and financial burden of hospitalised community-acquired pneumonia in patients with selected underlying comorbidities in England
Source: HighWire-hosted journal article supplement (doi:10.1136/bmjresp-2020-000703), 2020-10-01
Supplement: bmjresp-2020-000703supp001_data_supplement.pdf [file bmjresp-2020-000703supp001_data_supplement.pdf]

## Supplementary Files

### Supplementary Box 1. HES database

#### HES database

- HES is a data warehouse containing clinical information of all admissions, bed days, length of admission, outpatient appointments, attendances at A&E departments for NHS hospitals in England and hospital death.
- It is a record-based system covering all NHS Trusts in England. This data is collected to allow hospitals to be paid for the care that they deliver.
- The primary diagnosis and other clinical conditions are specified using the tenth revision of the International Classification of Disease coding system (ICD-10).
- Each patient has their own unique NHS identifier which ensured patients were not double counted within the analysis.

**Supplementary Table 1. ICD-10 codes**

| #  | Cohort Name                 | ICD-10 Codes <sup>1</sup>                                                                                                                | Outpatient Medical Speciality                                                                                     |
|----|-----------------------------|------------------------------------------------------------------------------------------------------------------------------------------|-------------------------------------------------------------------------------------------------------------------|
| 1. | Pneumonia                   | J12, J13, J14, J15, J16, J17, J18                                                                                                        | 340 Thoracic Medicine                                                                                             |
| 2. | Chronic respiratory disease | J40, J41, J42, J43, J44, J47, J6, J7, J80, J81, J82, J83, J84, Q30, J31 Q32, Q33 Q34, Q35, Q36, Q37                                      | 170 Cardiothoracic surgery<br>173 Thoracic surgery<br>174 Cardiothoracic transplantation<br>340 Thoracic Medicine |
| 3. | Chronic heart disease       | I05, I06, I07, I08, I09, I11, I12, I13, I20, I21, I22, I25, I27, I28, I3, I40, I41, I42, I43, I44, I45, I47, I48, I49, I50, I51, I52, Q2 | 170 Cardiothoracic surgery<br>172 Cardiac surgery<br>174 Cardiothoracic transplantation<br>320 Cardiology         |
| 4. | Chronic kidney disease      | N00, N01, N02, N03, N04, N05, N07, N08, N11, N12, N14, N15, N16, N18, N19, N25, Q60, Q61                                                 | 102 Transplantation surgery<br>361 Nephrology                                                                     |
| 5. | Chronic liver disease       | K70, K71, K72, K73, K74, K75, K76, K77, P78.8, Q44                                                                                       | 102 Transplantation surgery<br>105 Hepatobiliary & pancreatic surgery<br>306 Hepatology                           |
| 6. | Diabetes                    | E10, E11, E12, E13, E14, E24, G59.0, G63.2, G73.0, G99.0, N08.3, O24, P70.0, P70.1, P70.2                                                | 105 Hepatobiliary & pancreatic surgery<br>302 Endocrinology<br>307 Diabetic Medicine                              |
| 7. | Post-BMT                    | Z94.8                                                                                                                                    | 303 Clinical Haematology<br>308 Bone and marrow transplantation                                                   |

<sup>1</sup> ICD codes taken from Rozenbaum et al 2012

**Supplementary Table 2. Adjusted Odds Ratios for mortality in each clinical risk group for those who developed hospitalised CAP compared to those who did not.**

| Clinical Risk Group | Mortality Odds Ratio (95% CI) |
|---------------------|-------------------------------|
| CHD                 | 5.37 (5.18, 5.56) p<0.0001    |
| CKD                 | 5.26 (4.96, 5.59) p<0.0001    |
| CLD                 | 4.76 (4.12, 5.51) p<0.0001    |
| CRD                 | 5.94 (5.65, 6.24) p<0.0001    |
| Diabetes            | 4.89 (4.63, 5.16) p<0.0001    |
| Post-BMT            | 7.50 (4.71, 11.92) p<0.0001   |
